# Supplementary material
Source: PubMed Central journal article supplement (PMC4583342)
Supplement: NIHMS676031-supplement-2.pdf [file NIHMS676031-supplement-2.pdf]

**SUPPLEMENTAL FIGURE LEGENDS**

**Supplemental Figure 1.** Additional characterization of IPTG-inducible shRNA expression in Rh30 cells. A, Western blot analysis of four 12q13-14 amplicon-negative RMS cell lines compared to 12q13-14 amplicon-positive Rh30 cells stably expressing IPTG-inducible NT control shRNA or three different shRNAs targeting CDK4. Rh30 cells were treated with 75  $\mu$ M IPTG for 48 h. B, The lowest IPTG concentration inducing maximal knockdown of CDK4 is 75  $\mu$ M. Rh30 cells stably expressing IPTG-inducible shRNA #2 targeting CDK4 were treated with vehicle or the IPTG concentrations indicated for 48 h. C, IPTG reduces CDK4 mRNA levels in Rh30 cells in a dose-dependent manner. Data represent the mean  $\pm$  SD of quadruplicate samples from three independent experiments. \*  $p < 0.0005$ , \*\*  $p < 0.00005$  by Student's t-test. D, Levels of MYH and myogenin are unaffected by CDK4 knockdown. Rh30 cells stably expressing IPTG-inducible shRNA #2 or #3 targeting CDK4 were treated with vehicle or 100  $\mu$ M IPTG for 5 days. Media containing IPTG was replenished on day 3.

**Supplemental Figure 2.** Depletion of CDK4 represses the proliferative and transformative capacity of non-amplified fusion-positive RMS cells. Rh41 cells stably expressing IPTG-inducible NT control shRNA or two different shRNAs targeting CDK4 treated with vehicle, 10  $\mu$ M IPTG, or 75  $\mu$ M IPTG demonstrate reduced CDK4 in a dose-dependent manner at the (A) protein and (B) mRNA levels by Western blot and qPCR analysis, respectively. qPCR data represent the mean  $\pm$  SD of quadruplicate samples from three independent experiments. C, Cell proliferation and (D) focus formation are abrogated upon IPTG-inducible knockdown of CDK4.

Data are the mean  $\pm$  SD of triplicate samples from two independent experiments. \*  $p < 0.0005$ , \*\*  $p < 0.00005$  by Student's t-test.

**Supplemental Figure 3.** Further evaluation of CDK4/6 inhibitor sensitivity in fusion-positive and fusion-negative RMS cells. A, PD0332991 attenuates viability of fusion-positive RMS cells. B, LEE011 fails to affect most fusion-negative RMS cell lines. C, Doxycycline-inducible overexpression of CDK4 rescues viability of Rh41 cells treated with PD0332991. Cells were treated with a range of doxycycline concentrations in the presence of vehicle or 1  $\mu$ M PD0332991. Data represent the mean  $\pm$  SD of five replicates from three independent experiments. \*  $p < 0.05$  by Student's t-test.
